# Supplementary material for: The sympathetic tone mediates leptin's inhibition of insulin secretion by modulating osteocalcin bioactivity
Source: PubMed Central journal article supplement — J Cell Biol. 2008 Dec 29;183(7):1235–42. doi: 10.1083/jcb.200809113 (PMC2606962; doi:10.1083/jcb.200809113), 2008-12-29
Supplement: jcb.200809113_1.pdf [file jcb.200809113_1.pdf]

Hinoi et al., <http://www.jcb.org/cgi/content/full/jcb.200809113/DC1>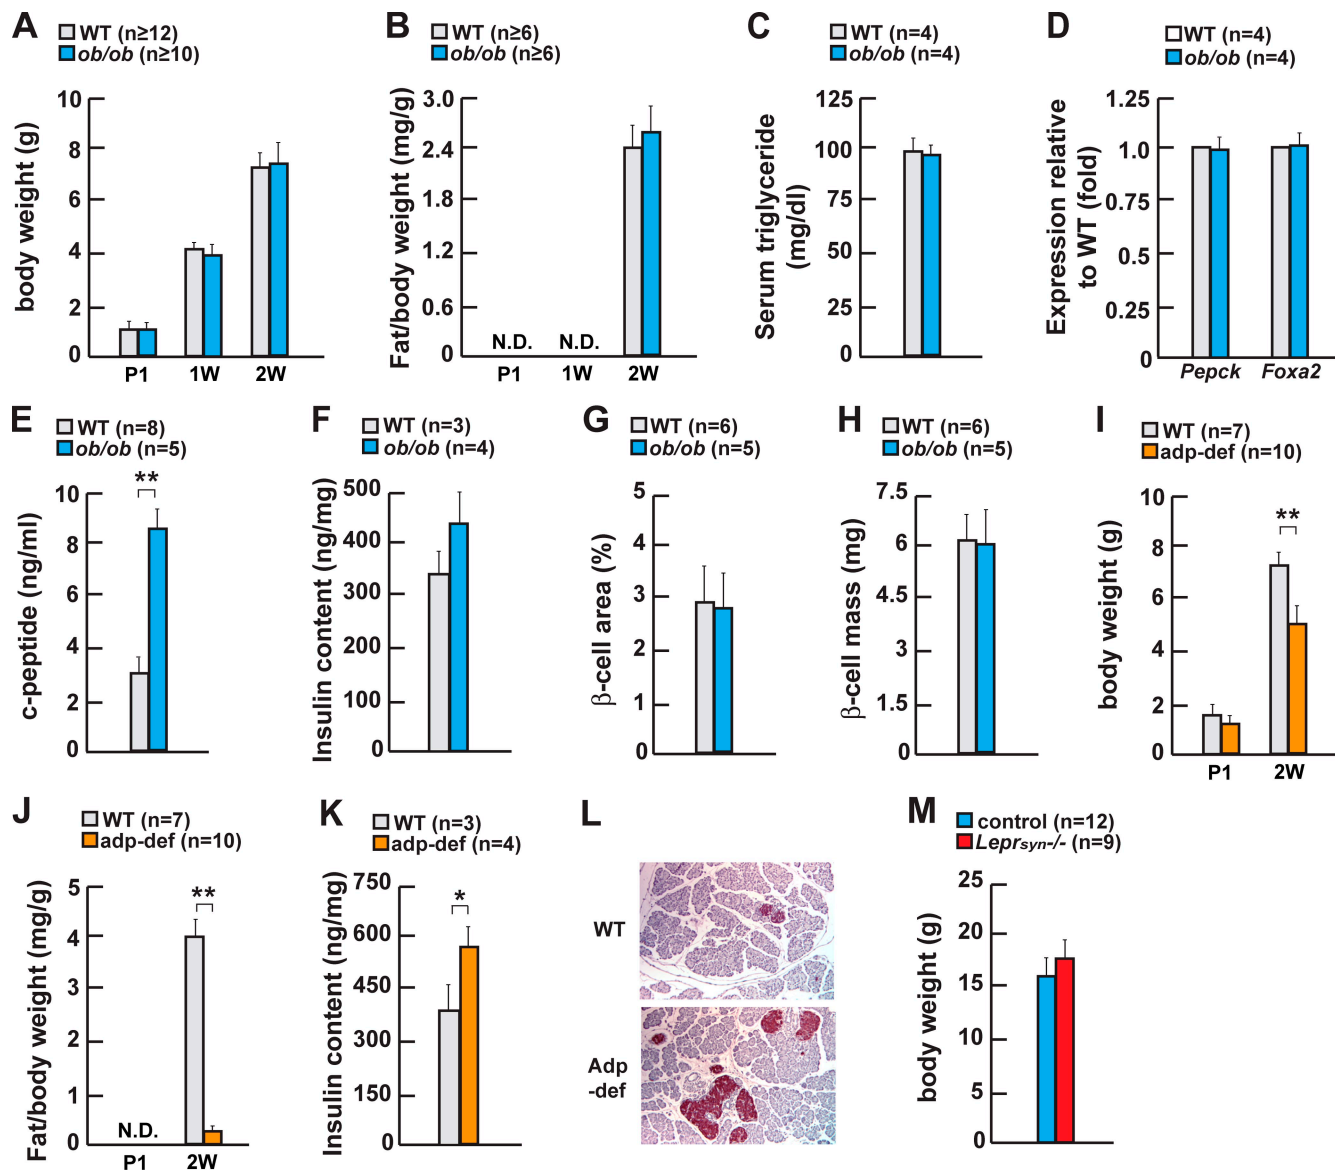

Figure S1. **The characterization of *ob/ob* and adipocyte-deficient mice.** (A and B) Body weight and fat mass in *ob/ob* mice. (C) Serum triglyceride in 2-wk-old *ob/ob* mice. (D) Expression of markers of insulin sensitivity in liver of 2-wk-old *ob/ob* mice. (E) Serum c-peptide in 2-wk-old *ob/ob* mice. (F–H) Insulin content, β-cell area, and β-cell mass in 2-wk-old *ob/ob* mice. (I and J) Body weight and fat mass in adipocyte-deficient (*adp-def*) mice. (K and L) Insulin content and insulin immunostaining in pancreas of 2-wk-old adipocyte-deficient mice. (M) Body weight in 1-mo-old *Lep<sup>rsyn</sup><sup>-/-</sup>* mice. \*,  $P < 0.05$ ; \*\*,  $P < 0.01$ . P1, newborn; 1W, 1 wk old; 2W, 2 wk old.

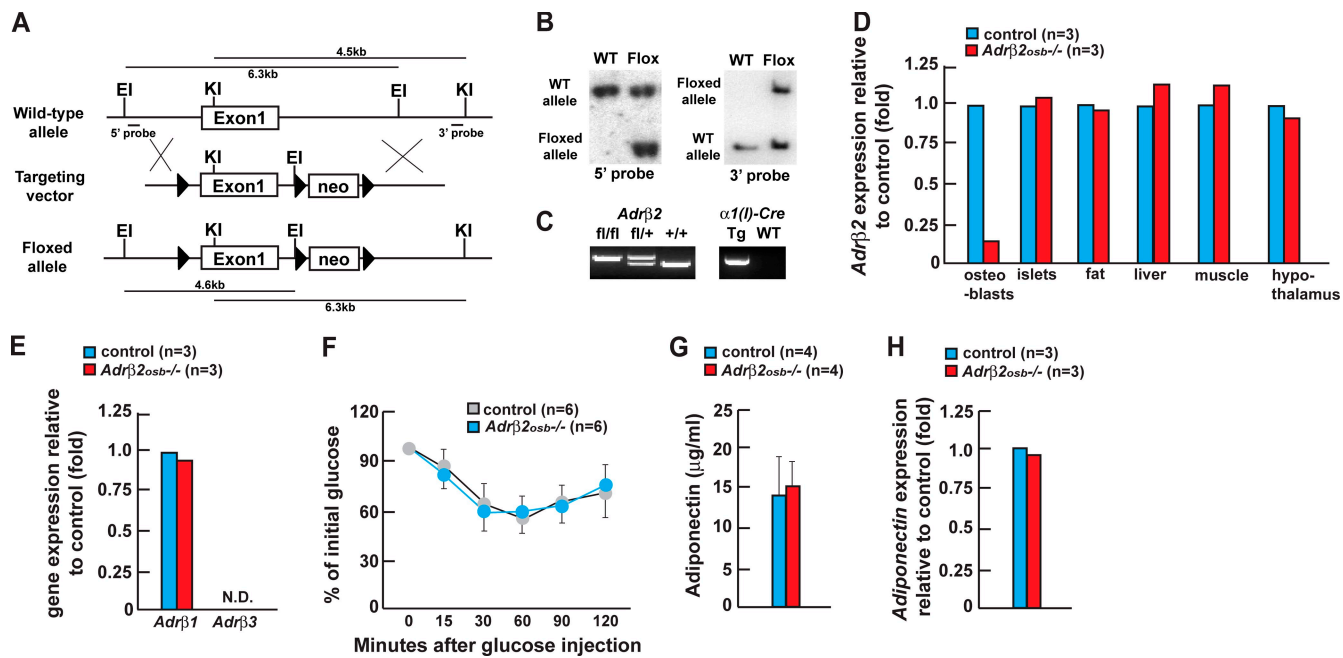

Figure S2. **Generation of *Adrβ2*<sup>osb-/-</sup> mice.** (A) Targeting construct for conditional inactivation of *Adrβ2*. Black triangles, LoxP sites; EI, EcoRI; KI, KpnI. (B) Southern blot analysis of *Adrβ2*-floxed clone. The 5' probe detected a 6.3-kb WT and 4.6-kb targeted band, whereas the 3' probe detected a 4.5-kb WT and 6.3-kb targeted band. (C) PCR genotyping of *Adrβ2*<sup>osb-/-</sup> mice. WT and floxed allele yield 250 bp and 290 bp products, respectively. *α1(I) collagen-Cre* transgenic mice harbor a transgene-specific band. (D) *Adrβ2* expression in several tissues of *Adrβ2*<sup>osb-/-</sup> mice. (E) *Adrβ1* and *Adrβ3* expression in osteoblasts of *Adrβ2*<sup>osb-/-</sup> mice. ND, not detected. (F) ITT in 2-mo-old *Adrβ2*<sup>osb-/-</sup> mice. (G) Serum adiponectin in *Adrβ2*<sup>osb-/-</sup> mice. (H) Adiponectin expression in fat of *Adrβ2*<sup>osb-/-</sup> mice. Results are given as mean ± SEM.

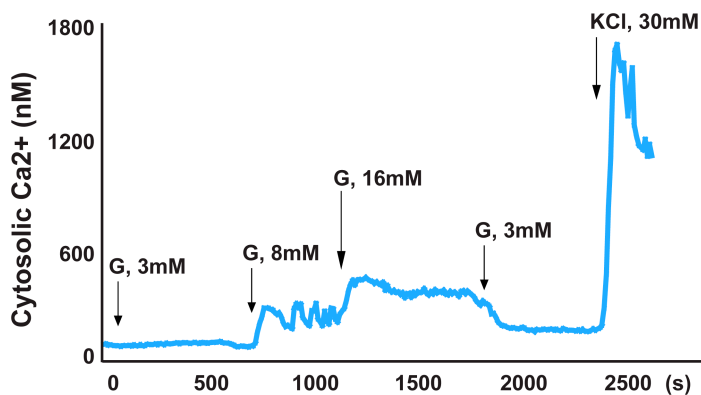

Figure S3. **Intracellular calcium imaging assay performed on untreated WT mice islets at different concentrations of glucose.**

Table S1. **Insulin sensitivity analysis of 2-mo-old *ob/ob* and *ob/ob;Esp<sup>-/-</sup>* mice analyzed by hyperinsulinemic-euglycemic clamps**

| Genotype                                                            | WT          | <i>ob/ob</i> | <i>ob/ob;Esp<sup>-/-</sup></i> |
|---------------------------------------------------------------------|-------------|--------------|--------------------------------|
| Body weight (g)                                                     | 17.8 ± 0.4  | 38.0 ± 1.7   | 31.5 ± 1.0                     |
| Glucose infusion rate (mg/kg/min)                                   | 64.9 ± 4.7  | 0.0 ± 0.0    | 0.0 ± 0.0                      |
| Basal glucose (mM)                                                  | 6.6 ± 0.9   | 16.6 ± 1.5   | 11.5 ± 1.9                     |
| Clamp glucose (mM)                                                  | 6.4 ± 0.6   | 13.8 ± 1.8   | 11.0 ± 1.4                     |
| [ <sup>3</sup> H]Glucose-specific activity (10 <sup>3</sup> dpm/mg) | 200.2 ± 5.8 | 279.6 ± 14.9 | 321.6 ± 19.5                   |
| Basal hepatic glucose production (mg/kg/min)                        | 15.9 ± 2.9  | 17.0 ± 1.2   | 15.1 ± 3.1                     |
| Clamp hepatic glucose production (mg/kg/min)                        | -1.0 ± 4.2  | 20.7 ± 0.4   | 23.0 ± 1.6                     |
| Glucose turnover (mg/kg/min)                                        | 63.9 ± 2.5  | 20.7 ± 0.4   | 23.0 ± 1.6                     |
| Glycogen synthesis (mg/kg/min)                                      | 30.3 ± 1.9  | 4.4 ± 2.6    | 1.1 ± 0.4                      |
| Muscle glucose uptake (mg/kg/min)                                   | 65.4 ± 3.3  | 25.2 ± 5.7   | 22.3 ± 1.9                     |
| White adipose glucose uptake (mg/kg/min)                            | 4.5 ± 0.9   | 1.2 ± 0.3    | 1.4 ± 0.2                      |

For WT, *ob/ob*, and *ob/ob;Esp<sup>-/-</sup>* mice, n = 4.
